# Supplementary material for: Utilization of Pomelo (Citrus maxima) Peel Waste into Bioactive Essential Oils: Chemical Composition and Insecticidal Properties
Source: MDPI journal article supplement (doi:10.3390/insects13050480), 2022-05-20
Supplement: s1 [file s1]

## Contact toxicity

**Supplementary Table S1.** Efficacy of contact toxicity of CMEO against *T. castaneum* and *C. maculatus* at different exposure times

| Test insects        | Dose<br>(mg/cm <sup>2</sup> ) | Mean mortality per cent of treatments after |             |
|---------------------|-------------------------------|---------------------------------------------|-------------|
|                     |                               | 24 h                                        | 48 h        |
| <i>T. castaneum</i> | 40                            | 36.7±3.3b                                   | 76.7±6.6bc  |
|                     | 60                            | 46.7±8.8b                                   | 83.3±3.3ab  |
|                     | 80                            | 50.0±11.5b                                  | 70.0±5.7c   |
|                     | 100                           | 80.0±5.7a                                   | 83.3±3.3ab  |
|                     | 120                           | 90.0±5.7a                                   | 93.3±3.3a   |
|                     | Control                       | 0±0c                                        | 0±0d        |
|                     | F value                       | 21.54                                       | 62.80       |
|                     | P value                       | 0.00                                        | 0.00        |
| <i>C. maculatus</i> | 2                             | 6.7±3.3de                                   | 16.7±3.3cd  |
|                     | 4                             | 13.3±3.3d                                   | 23.3±3.3c   |
|                     | 6                             | 36.7±3.3c                                   | 50.0±10.0b  |
|                     | 8                             | 50.0±5.7b                                   | 70.0±10.0ab |
|                     | 10                            | 83.3±3.3a                                   | 90.0±5.7a   |
|                     | Control                       | 0±0e                                        | 0±0d        |
|                     | F value                       | 77.13                                       | 24.30       |
|                     | P value                       | 0.00                                        | 0.00        |

\*Means within the same rows followed by same letter are not significantly different (p<0.05)

## Fumigant toxicity

**Supplementary Table S2.** Efficacy of fumigant toxicity of CMEO against *T. castaneum* and *C. maculatus* at different exposure times

| Test insects        | Dose<br>(mg/L air) | Mean mortality per cent of treatments after |           |
|---------------------|--------------------|---------------------------------------------|-----------|
|                     |                    | 24 h                                        | 48 h      |
| <i>T. castaneum</i> | 1                  | 3.3±6.7d                                    | 6.7±3.3d  |
|                     | 3                  | 20.0±13.3cd                                 | 23.3±3.3c |
|                     | 5                  | 33.3±5.5bc                                  | 53.3±6.6b |
|                     | 7                  | 50.0±6.6b                                   | 60.0±0b   |
|                     | 10                 | 86.7±3.3a                                   | 93.3±3.3a |
|                     | Control            | 0±0d                                        | 0±0d      |
|                     | F value            | 32.07                                       | 151.31    |
|                     | P value            | 0.00                                        | 0.00      |
| <i>C. maculatus</i> | 1                  | 30.0±0c                                     | 53.3±8.8b |
|                     | 3                  | 43.3±6.6bc                                  | 56.7±8.8b |
|                     | 5                  | 56.7±6.6ab                                  | 70.0±5.7b |
|                     | 7                  | 63.3±3.3ab                                  | 73.3±6.6a |
|                     | 10                 | 76.7±6.6a                                   | 96.7±3.3c |
|                     | Control            | 0±0d                                        | 0±0d      |
|                     | F value            | 40.26                                       | 25.70     |
|                     | P value            | 0.00                                        | 0.00      |

\*Means within the same rows followed by same letter are not significantly different (p<0.05)
